# Supplementary material for: Dual Drug Loaded Biodegradable Nanofibrous Microsphere for Improving Anti-Colon Cancer Activity
Source: PubMed Central journal article supplement (PMC4914940; doi:10.1038/srep28373), 2016-06-21
Supplement: srep28373-s1.pdf [file srep28373-s1.pdf]

**supplementary information**

**Dual Drug Loaded Biodegradable Nanofibrous Microsphere for  
Improving Anti-Colon Cancer Activity**

Rangrang Fan<sup>1,\*</sup>, Xiaoling Li<sup>1,\*</sup>, Jiaojiao Deng<sup>1</sup>, Xiang Gao<sup>1</sup>, Liangxue Zhou<sup>1</sup>,  
Yu Zheng<sup>1</sup>, Aiping Tong<sup>1</sup>, Xiaoning Zhang<sup>2</sup>, Chao You<sup>1</sup> and Gang Guo<sup>1</sup>

1 State Key Laboratory of Biotherapy and Cancer Center, and Department of Neurosurgery, West  
China Hospital, Sichuan University, and Collaborative Innovation Center for Biotherapy, Chengdu  
610041, R. P. China

2 Department of Pharmacology and Pharmaceutical Sciences, School of Medicine, Tsinghua University,  
and Collaborative Innovation Center for Biotherapy, Beijing 100084, P. R. China

\* These authors contributed equally to this work and are co-first authors.

Correspondence and requests for materials should be addressed to G.G. (email: guogang@scu.edu.cn)

or to L.X.Z. (email: liangxue\_zhou@126.com).

Tel.: +86 2885164063; fax: +86 2885164060.

## Supplementary Figures

Table 1 Doses necessary to inhibit CT26 proliferation in a MTT assay by 10 (ID<sub>10</sub>), 30 (ID<sub>30</sub>), 50 (ID<sub>50</sub>), 70 (ID<sub>70</sub>), 90 (ID<sub>90</sub>) by single-agent docetaxel (DOC) or curcumin (CUR) and by combination of DOC and CUR (2:1).

|                  | DOC (µg/ml) | CUR (µg/ml) | DOC/CUR (2:1) (µg/ml) | CI   |
|------------------|-------------|-------------|-----------------------|------|
| ID <sub>10</sub> | 0.02        | 1           | 0.03/0.015            | 1.51 |
| ID <sub>30</sub> | 0.2         | 8           | 0.2/0.1               | 1.01 |
| ID <sub>50</sub> | 2.2         | 15          | 1.5/0.75              | 0.73 |
| ID <sub>70</sub> | 10          | 26          | 7/3.5                 | 0.83 |
| ID <sub>90</sub> | 14          | 48          | 11/5.5                | 0.89 |

Table 2 Doses necessary to inhibit CT26 proliferation in a MTT assay by 10 (ID<sub>10</sub>), 30 (ID<sub>30</sub>), 50 (ID<sub>50</sub>), 70 (ID<sub>70</sub>), 90 (ID<sub>90</sub>) by single-agent docetaxel (DOC) or curcumin (CUR) and by combination of DOC and CUR (1:1).

|                  | DOC (µg/ml) | CUR (µg/ml) | DOC/CUR (1:1) (µg/ml) | CI   |
|------------------|-------------|-------------|-----------------------|------|
| ID <sub>10</sub> | 0.02        | 1           | 0.025/0.025           | 1.28 |
| ID <sub>30</sub> | 0.2         | 8           | 0.2/0.2               | 1.03 |
| ID <sub>50</sub> | 2.2         | 15          | 1.4/1.4               | 0.72 |
| ID <sub>70</sub> | 10          | 26          | 5/5                   | 0.69 |
| ID <sub>90</sub> | 14          | 48          | 9/9                   | 0.83 |

Table 3 Doses necessary to inhibit CT26 proliferation in a MTT assay by 10 (ID<sub>10</sub>), 30 (ID<sub>30</sub>), 50 (ID<sub>50</sub>), 70 (ID<sub>70</sub>), 90 (ID<sub>90</sub>) by single-agent docetaxel (DOC) or curcumin (CUR) and by combination of DOC and CUR (1:2).

|                  | DOC (µg/ml) | CUR (µg/ml) | DOC/CUR (1:2) (µg/ml) | CI   |
|------------------|-------------|-------------|-----------------------|------|
| ID <sub>10</sub> | 0.02        | 1           | 0.025/0.05            | 1.3  |
| ID <sub>30</sub> | 0.2         | 8           | 0.2/0.4               | 1.05 |
| ID <sub>50</sub> | 2.2         | 15          | 1.7/3.4               | 0.98 |
| ID <sub>70</sub> | 10          | 26          | 4/8                   | 0.71 |
| ID <sub>90</sub> | 14          | 48          | 8/16                  | 0.90 |

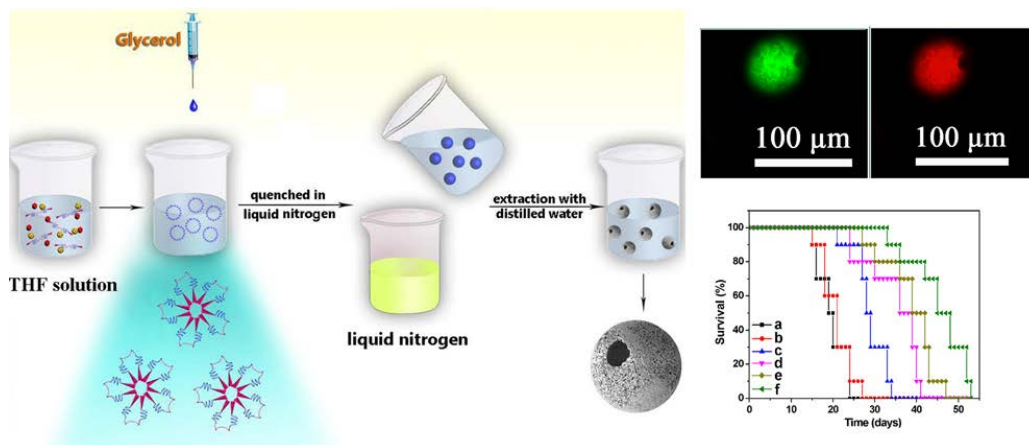

**Figure S1.** The schematic illustration of DOC+CUR/nanofibrous microspheres and the improved anti-colon cancer activity. The figure was drawn with ChemDraw and Adobe Photoshop by the author R.R.F.

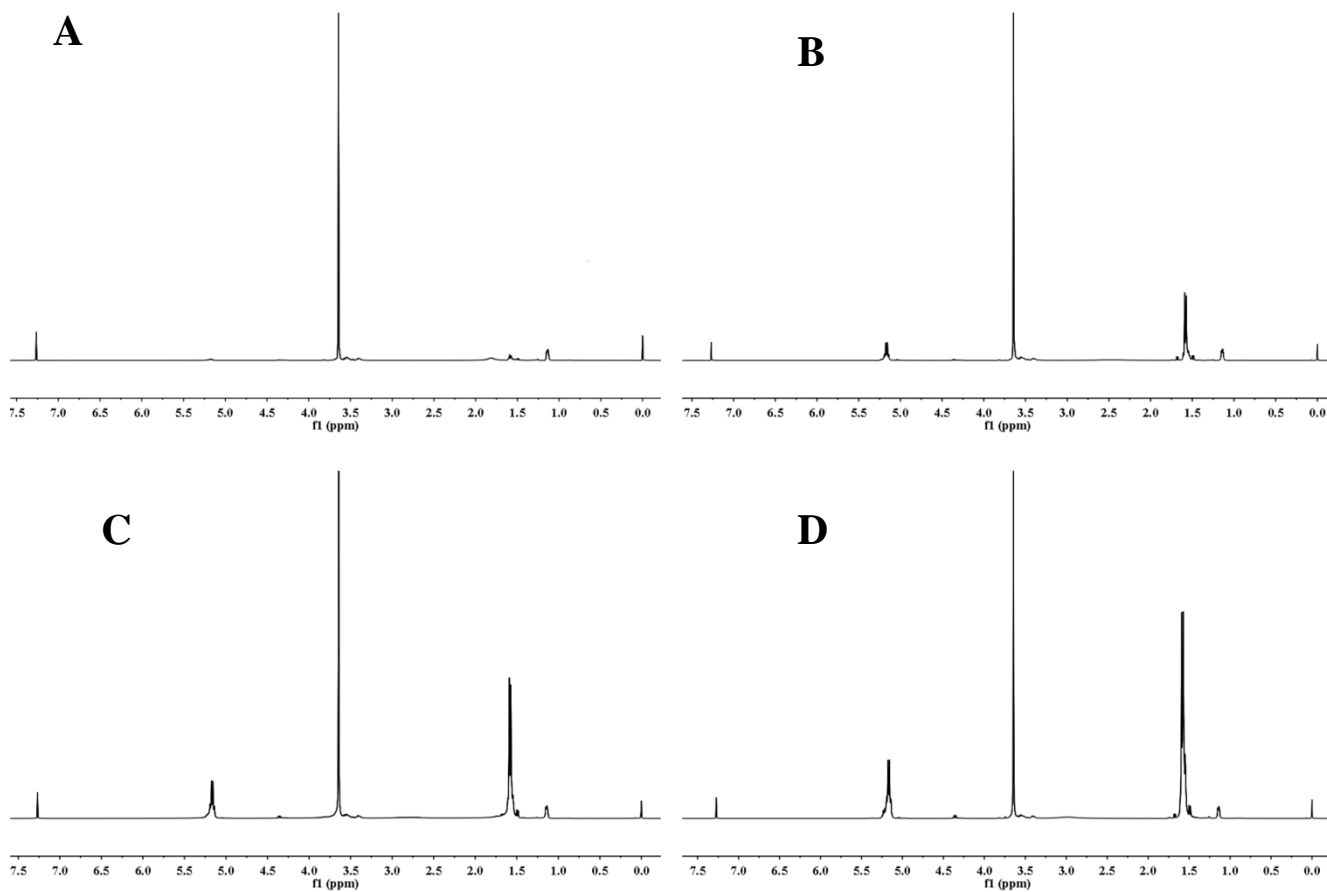

**Figure S2.** <sup>1</sup>H-NMR of PLFL copolymer PLFL<sub>10K</sub> (A), PLFL<sub>20K</sub> (B), PLFL<sub>30K</sub> (C), PLFL<sub>45K</sub> (D).

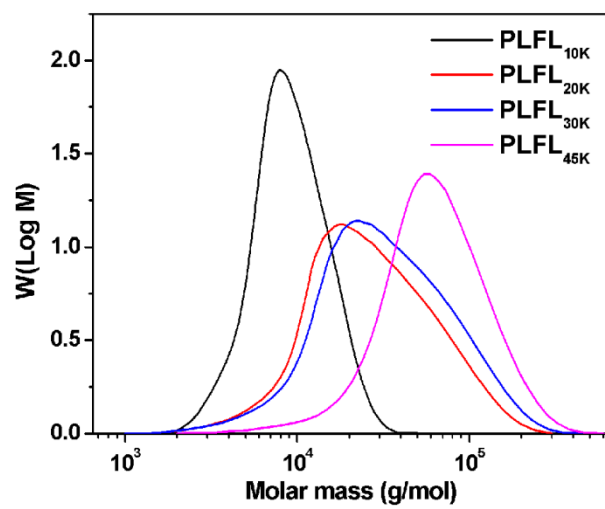

**Figure S3.** The GPC curves of PLFL block copolymers.

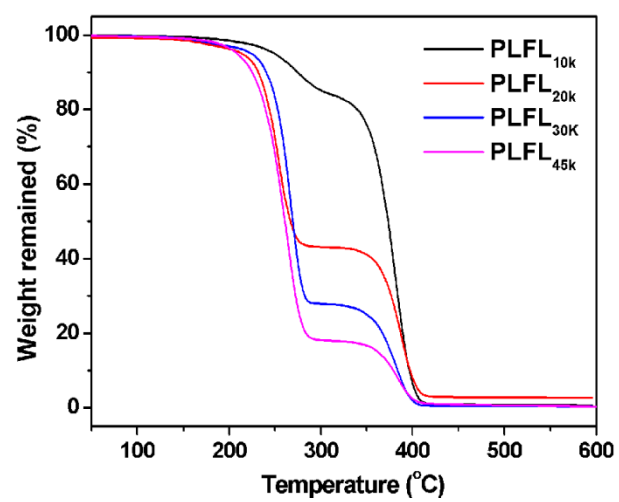

**Figure S4.** The TG curves of PLFL block copolymers.



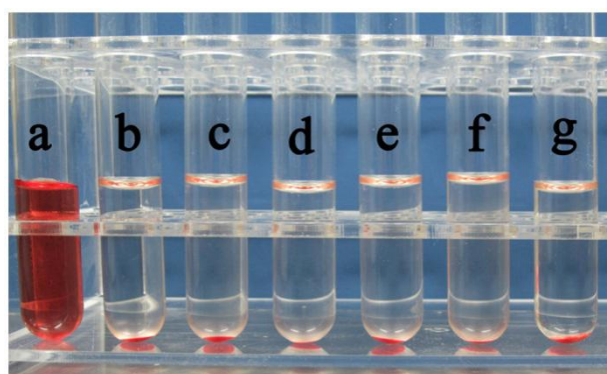

**Figure S5.** Hemolytic test on the blank PLFL nanofibrous MSs. The concentration of blank PLFL nanofibrous MSs is (a) Distilled water used as positive control; (b) Normal saline used as negative control; (c) 4 mg/ml;(d) 8 mg/ml; (e) 16 mg/ml; (f) 32 mg/ml; (g) 64 mg/ml.

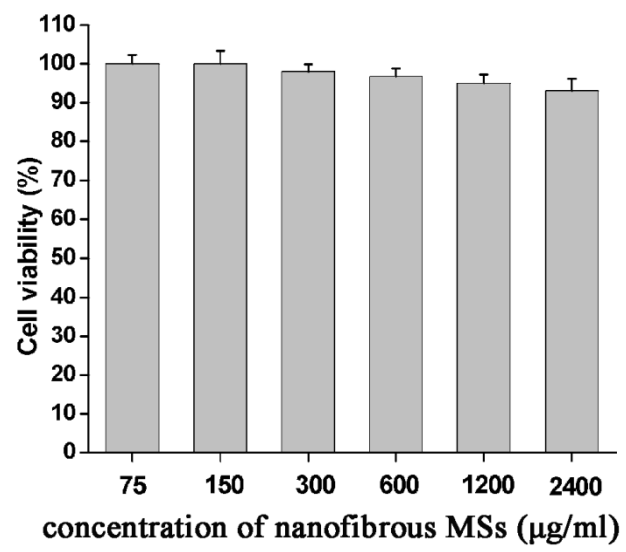

**Figure S6.** Cytotoxicity of blank PLFL nanofibrous MSs on L929 cells

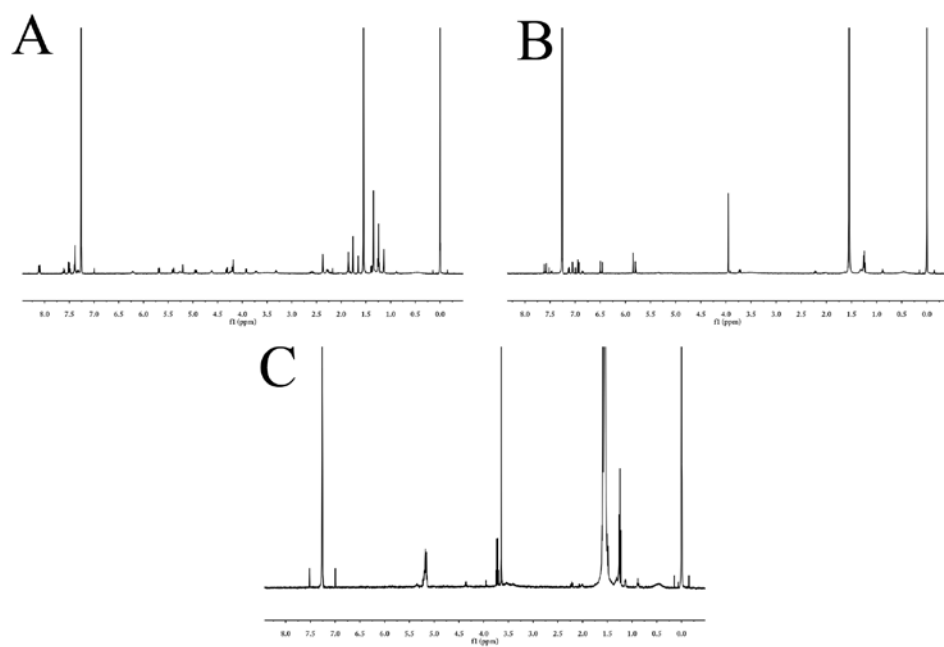

**Figure S7.**  $^1\text{H-NMR}$  of DOC (A), CUR (B), DOC+CUR/nanofibrous microspheres (C).

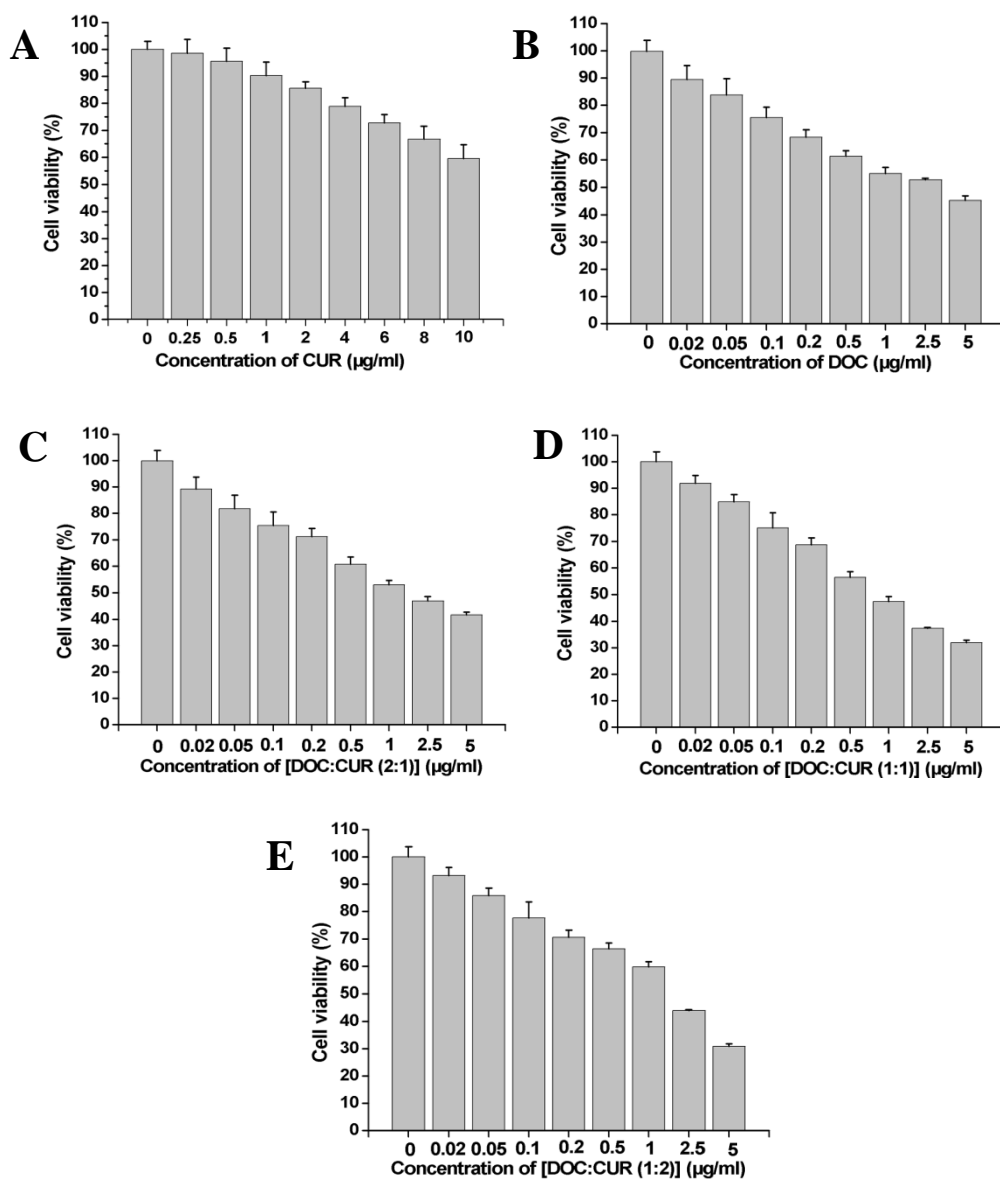

**Figure S8.** The MTT of free DOC (A), free CUR (B), free (DOC+CUR) (2:1) (C), free (DOC+CUR) (1:1) (D), free (DOC+CUR) (1:2) (E), which containing equivalent concentration of DOC. In Figure S8 (C-E), the horizontal ordinate refers to the doses of DOC.

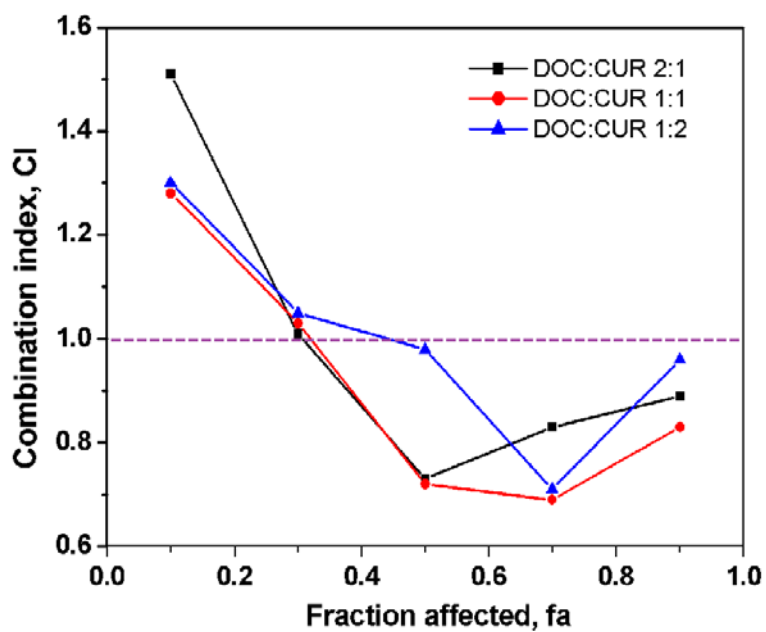

**Figure S9.** Combination Index (CI) for CT26 cells evaluated using the Chou and Talalay method.

CI is plotted as a function of the fraction affected ( $f_a$ ), which represents the percentage of growth inhibition, evaluated using the MTT assay (0.5=50%). In this manner, the combination of DOC and CUR could be analyzed for synergism ( $CI < 1$ ) or antagonism ( $CI > 1$ ). The straight line at  $CI = 1$  represents the additive effects of both drugs.
